# Supplementary material for: A novel electrochemical lung cancer biomarker cytokeratin 19 fragment antigen 21-1 immunosensor based on Si3N4/MoS2 incorporated MWCNTs and core–shell type magnetic nanoparticles
Source: Royal Society of Chemistry journal article supplement (doi:10.1039/d1nr00244a), 2021-01-01
Supplement: d1nr00244a1.pdf [file d1nr00244a1.pdf]

## Supplementary Data

For

**A novel electrochemical lung cancer biomarker cytokeratin 19 fragment antigen 21-1  
immunosensor based on Si<sub>3</sub>N<sub>4</sub>/MoS<sub>2</sub> incorporated MWCNTs and core-shell type  
magnetic nanoparticles**

Mehmet Lütfi Yola<sup>a\*</sup>, Necip Atar<sup>b</sup>, Nermin Özcan<sup>c</sup>

<sup>a</sup>*Hasan Kalyoncu University, Faculty of Health Sciences, Department of Nutrition and Dietetics, Gaziantep, Turkey*

<sup>b</sup>*Pamukkale University, Faculty of Engineering, Department of Chemical Engineering, Denizli, Turkey*

<sup>c</sup>*Iskenderun Technical University, Faculty of Engineering and Natural Sciences, Department of Biomedical Engineering, Hatay, Turkey*

\* To whom correspondence should be addressed:

E-mail: [mlutfi.yola@hku.edu.tr](mailto:mlutfi.yola@hku.edu.tr)

Tel.: +903422118080 Fax: +903422118081

## **2.7. Sample preparation**

In this study, voltammetric CYFRA21-1 immunosensor was applied to plasma samples to present the application of immunosensor. CYFRA21-1 free plasma samples were obtained from Blood Bank in TURKEY.

For the experiments of recovery, four different plasma samples were prepared (Plasma sample1, Plasma sample2, Plasma sample3 and Plasma sample4). The contents of solutions were listed below:

(1): 0.100 pg mL<sup>-1</sup> CYFRA21-1, 10.00 pg mL<sup>-1</sup> CEA, 10.00 pg mL<sup>-1</sup> AA, 10.00 pg mL<sup>-1</sup> DA, 10.00 pg mL<sup>-1</sup> UA and 10.00 pg mL<sup>-1</sup> BSA

(2): 0.100 + 0.200 pg mL<sup>-1</sup> CYFRA21-1, 10.00 pg mL<sup>-1</sup> CEA, 10.00 pg mL<sup>-1</sup> AA, 10.00 pg mL<sup>-1</sup> DA, 10.00 pg mL<sup>-1</sup> UA and 10.00 pg mL<sup>-1</sup> BSA

(3): 0.100 + 0.400 pg mL<sup>-1</sup> CYFRA21-1, 10.00 pg mL<sup>-1</sup> CEA, 10.00 pg mL<sup>-1</sup> AA, 10.00 pg mL<sup>-1</sup> DA, 10.00 pg mL<sup>-1</sup> UA and 10.00 pg mL<sup>-1</sup> BSA

(4): 0.100 + 0.600 pg mL<sup>-1</sup> CYFRA21-1, 10.00 pg mL<sup>-1</sup> CEA, 10.00 pg mL<sup>-1</sup> AA, 10.00 pg mL<sup>-1</sup> DA, 10.00 pg mL<sup>-1</sup> UA and 10.00 pg mL<sup>-1</sup> BSA

The standard CEA, AA, DA, UA, and BSA solutions (10.00 pg mL<sup>-1</sup>) were firstly added into CYFRA21-1 free plasma samples (Plasma sample1). After that, 0.200, 0.400 and 0.600 pg mL<sup>-1</sup> standard CYFRA21-1 solutions were added into the solutions one by one, respectively (Plasma sample2, Plasma sample3 and Plasma sample4). After each addition of CYFRA21-1 solutions, plasma samples were spiked as follows:

1:2 mL methanol was added to an aliquot of 0.4 mL plasma sample in a 2.0 mL plastic centrifuge tube. After that, the centrifugation at 20000 rpm was performed for 15 minutes. The upper clear layer solution was diluted with 0.1 M PBS, pH 7.0 for analysis. The voltammograms were recorded in the potential range from +0.1 V to +0.5 V by voltammetric CYFRA21-1 immunosensor.

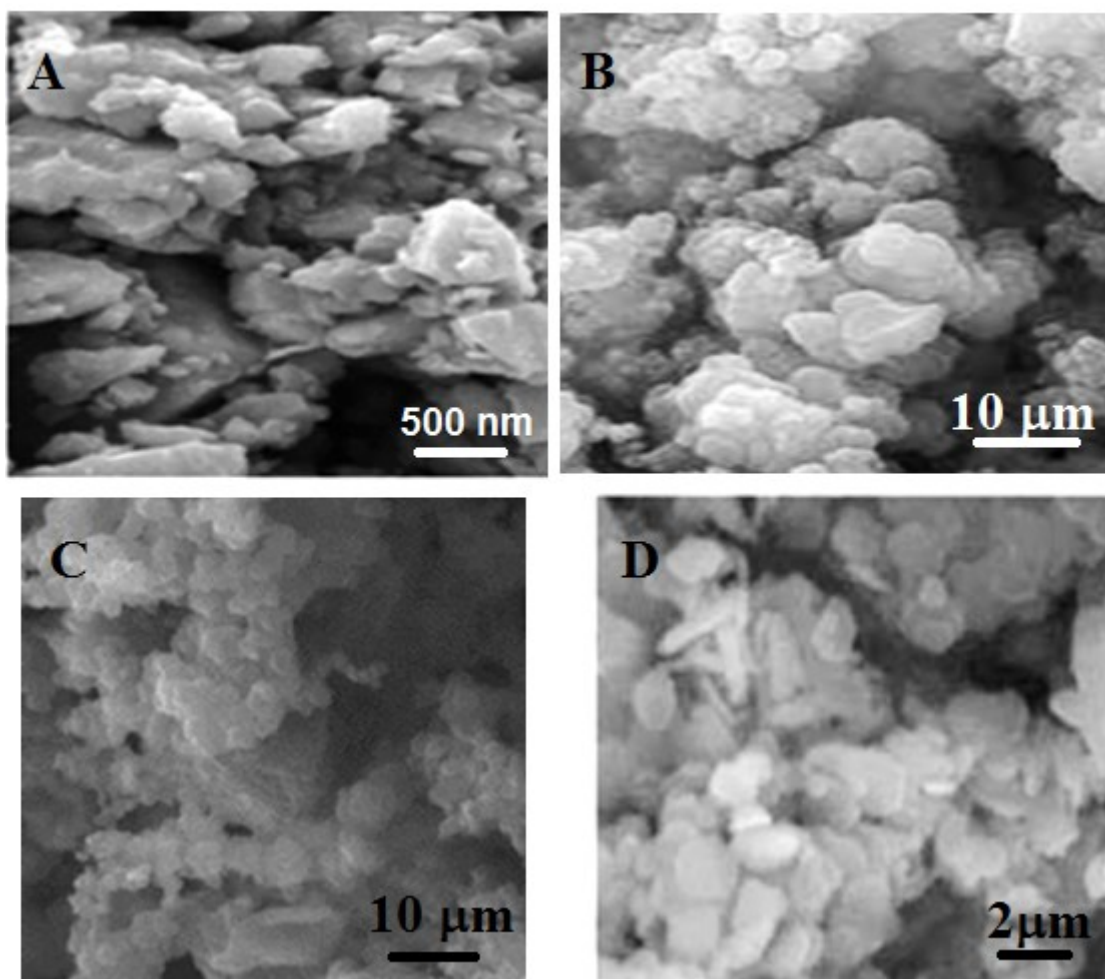

**Fig. S1.** SEM images of (A) Si<sub>3</sub>N<sub>4</sub>, (B) MoS<sub>2</sub> and (C-D) Si<sub>3</sub>N<sub>4</sub>/MoS<sub>2</sub> composite

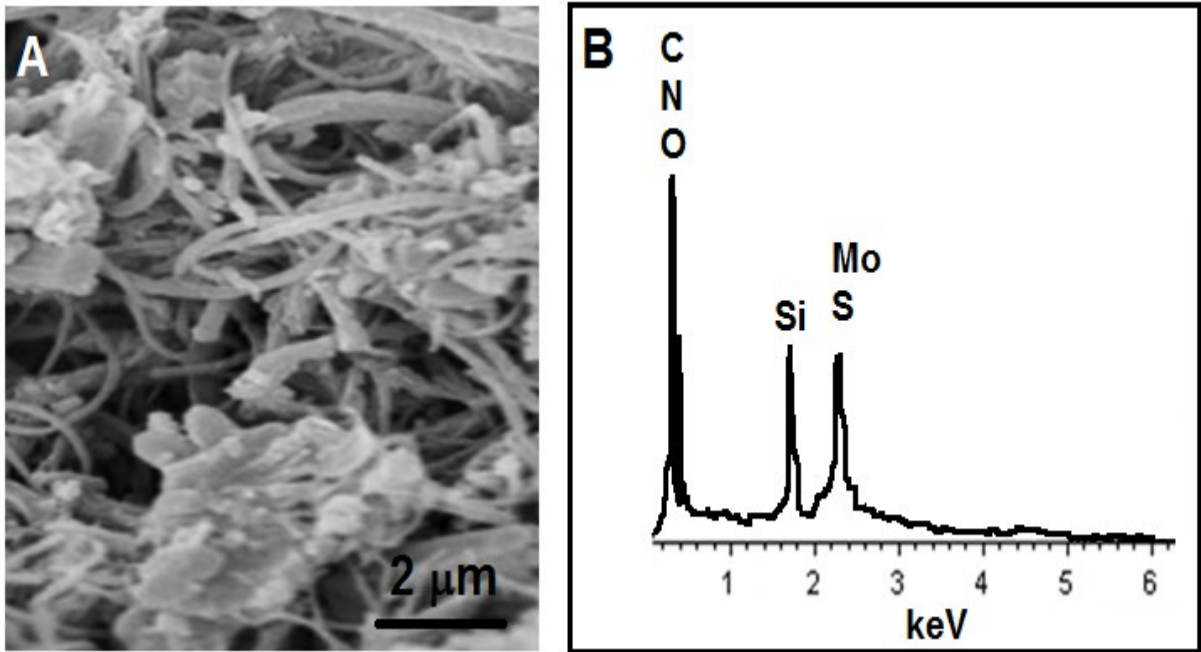

**Fig. S2.** SEM image of (A) Si<sub>3</sub>N<sub>4</sub>/MoS<sub>2</sub>-MWCNTs and EDX spectra of (B) Si<sub>3</sub>N<sub>4</sub>/MoS<sub>2</sub>-MWCNTs

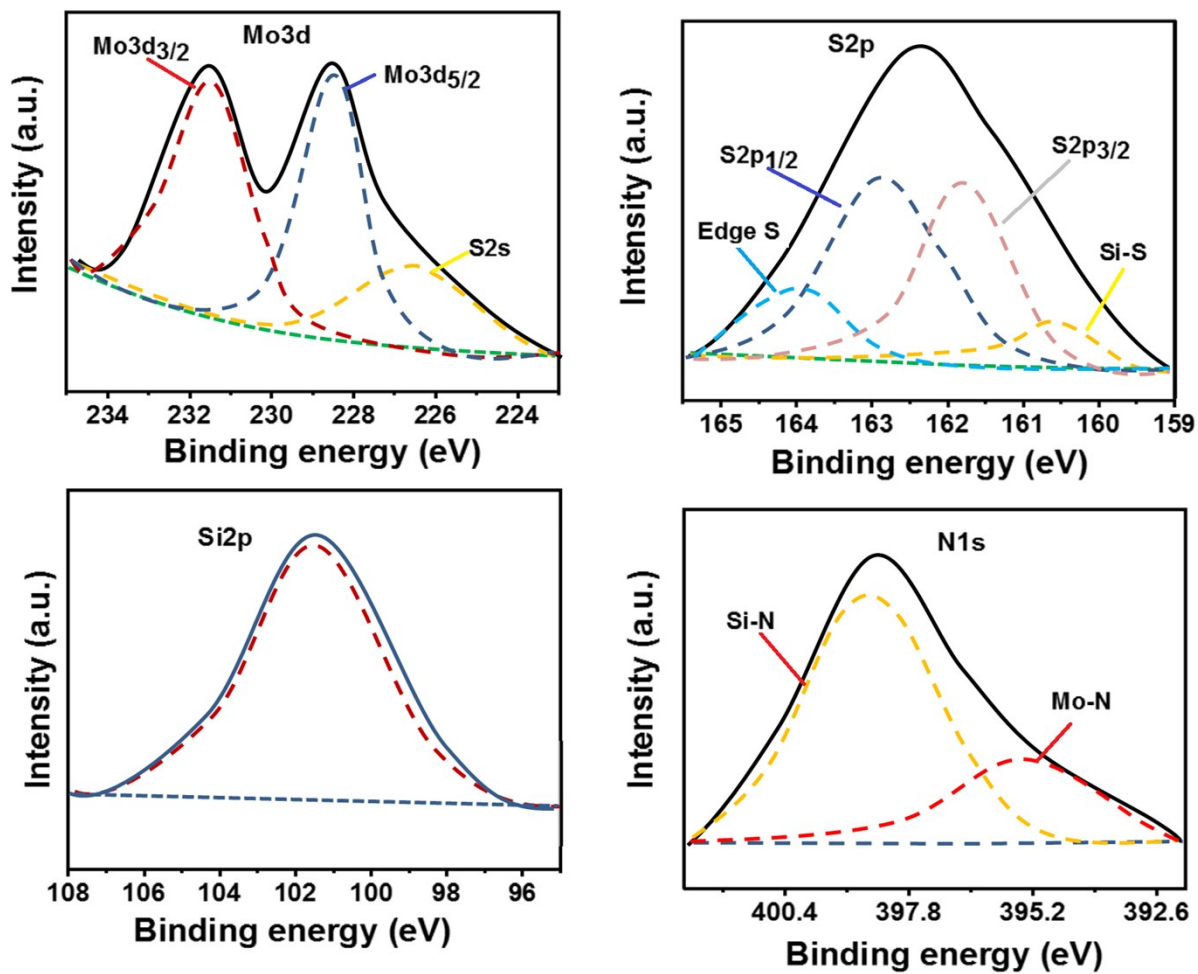

Fig. S3. XPS spectra of  $\text{Si}_3\text{N}_4/\text{MoS}_2$  composite

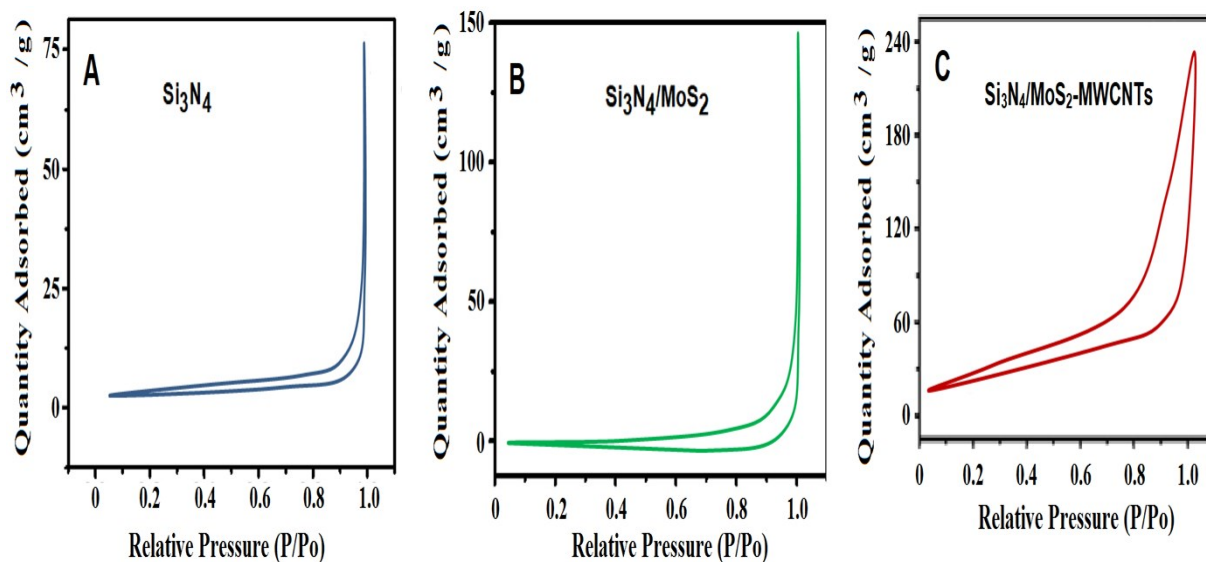

**Fig. S4.** Nitrogen adsorption-desorption isotherms of (A) Si<sub>3</sub>N<sub>4</sub>, (B) Si<sub>3</sub>N<sub>4</sub>/MoS<sub>2</sub> and (C) Si<sub>3</sub>N<sub>4</sub>/MoS<sub>2</sub>-MWCNTs

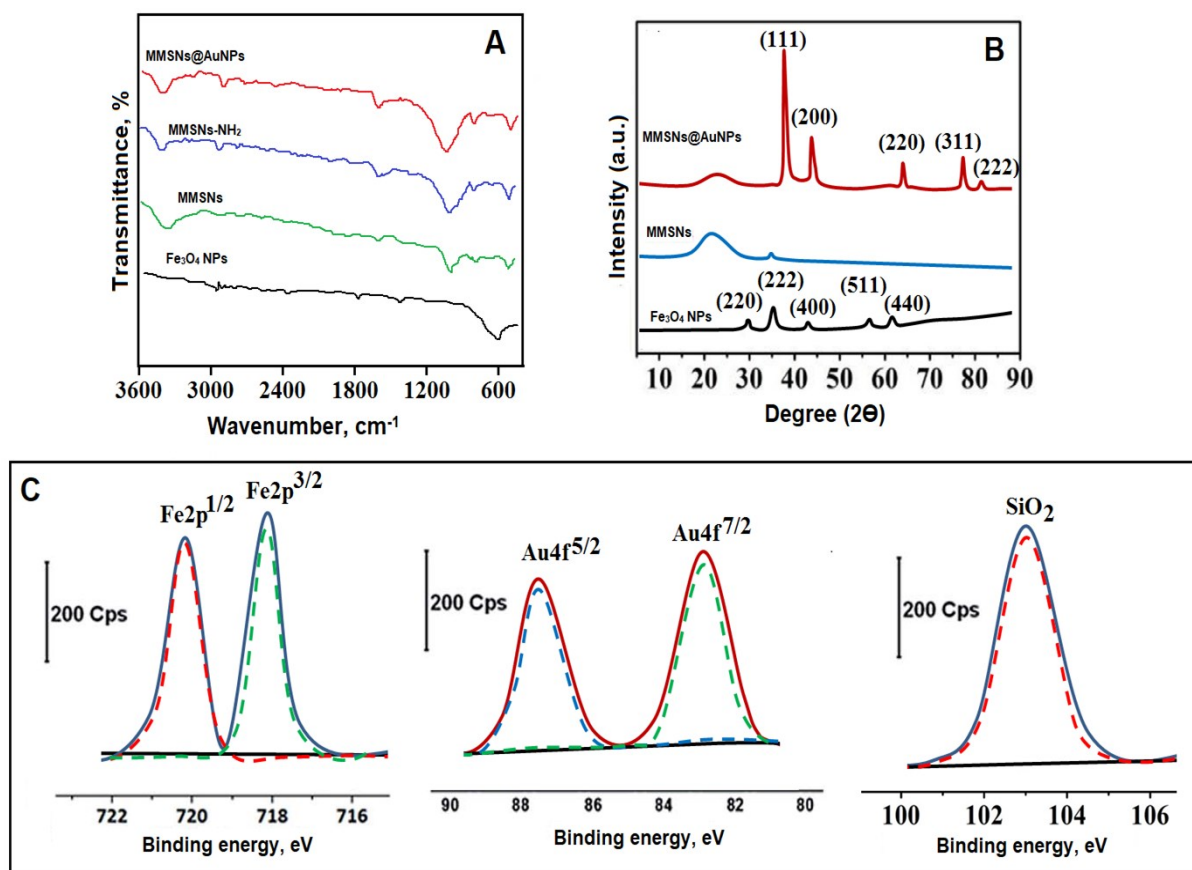

**Fig. S5.** (A) FTIR spectra of Fe<sub>3</sub>O<sub>4</sub> NPs, MMSNs, MMSNs-NH<sub>2</sub> and MMSNs@AuNPs, (B) XRD patterns of Fe<sub>3</sub>O<sub>4</sub> NPs, MMSNs and MMSNs@AuNPs, (C) Narrow region XPS spectra of Fe<sub>2</sub>p, Au<sub>4</sub>f, Si<sub>2</sub>p

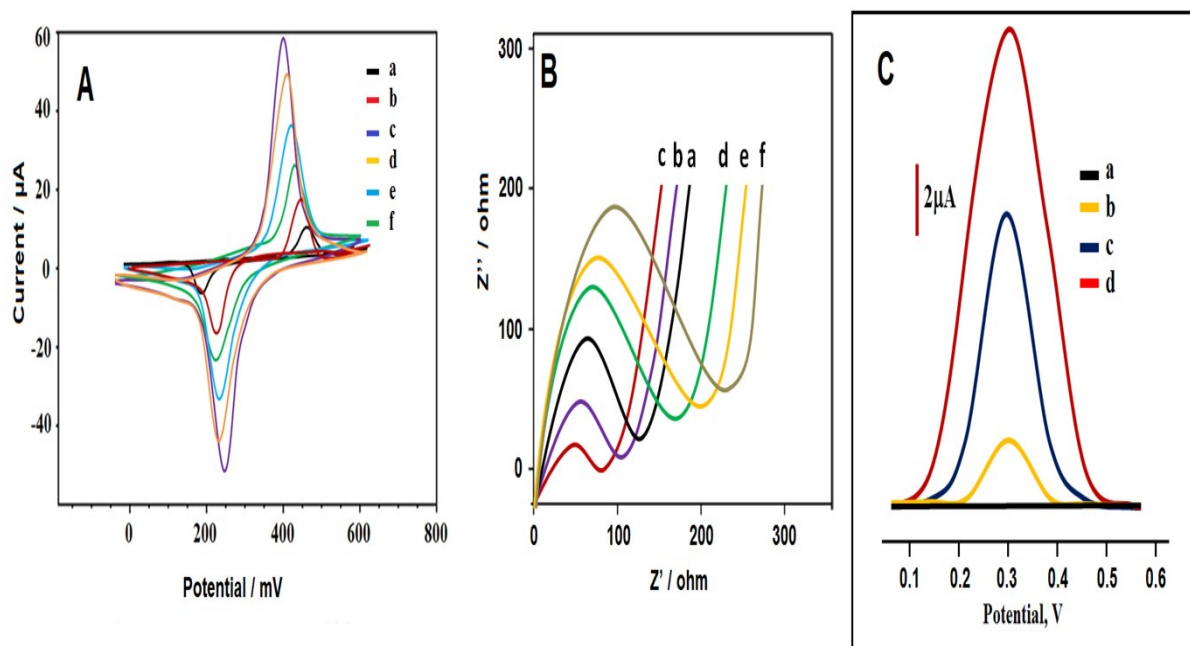

**Fig. S6.** (A) Cyclic voltammograms, (B) EIS responses at (a) bare GCE, (b) MWCNTs/GCE, (c)  $\text{Si}_3\text{N}_4/\text{MoS}_2\text{-MWCNTs/GCE}$ , (d) anti-CYFRA21-1- $\text{Ab}_1/\text{Si}_3\text{N}_4/\text{MoS}_2\text{-MWCNTs/GCE}$ , (e) BSA/anti-CYFRA21-1- $\text{Ab}_1/\text{Si}_3\text{N}_4/\text{MoS}_2\text{-MWCNTs/GCE}$ , (f) CYFRA21-1/anti-CYFRA21-1- $\text{Ab}_1/\text{Si}_3\text{N}_4/\text{MoS}_2\text{-MWCNTs/GCE}$  (scan rate of  $100 \text{ mV s}^{-1}$ ) and (C) DPV responses of the proposed immunosensors incubated with  $0.10 \text{ pg mL}^{-1}$  antigen CYFRA21-1 using (curve b) anti-CYFRA21-1- $\text{Ab}_2/\text{CYFRA21-1/anti-CYFRA21-1-Ab}_1/\text{Si}_3\text{N}_4/\text{MoS}_2\text{-MWCNTs/GCE}$ , (curve c) AuNPs/anti-CYFRA21-1- $\text{Ab}_2/\text{CYFRA21-1/anti-CYFRA21-1-Ab}_1/\text{Si}_3\text{N}_4/\text{MoS}_2\text{-MWCNTs/GCE}$ , (curve d) MMSNs@AuNPs/anti-CYFRA21-1- $\text{Ab}_2/\text{CYFRA21-1/anti-CYFRA21-1-Ab}_1/\text{Si}_3\text{N}_4/\text{MoS}_2\text{-MWCNTs/GCE}$  in absence of  $\text{H}_2\text{O}_2$  (curve a) and in presence of  $1.0 \text{ mM H}_2\text{O}_2$



### **3.4. Optimization for voltammetric measurements**

#### **3.4.1. MMSN@AuNPs/anti-CYFRA21-1-Ab<sub>2</sub> concentration effect**

MMSN@AuNPs/anti-CYFRA21-1-Ab<sub>2</sub> concentration has important effect on the developed immunosensor performance. The optimal and symmetrical peaks were observed up to 15.0 mg mL<sup>-1</sup>. Especially, after 15.0 mg mL<sup>-1</sup> MMSN@AuNPs/anti-CYFRA21-1-Ab<sub>2</sub>, the optimal and symmetrical peaks remained constant. Because of this, the optimal concentration of MMSN@AuNPs/anti-CYFRA21-1-Ab<sub>2</sub> was selected as 15.0 mg mL<sup>-1</sup> (Fig. S7A) (In the presence of 1.0 mM H<sub>2</sub>O<sub>2</sub> in 0.1 M PBS, pH 7.0).

#### **3.4.2. pH effect**

Secondly, pH effect was investigated on immunosensor performance. The immunosensor response increased up to pH 7.0. Furthermore, highly acidic or alkaline medium damages the structures of immobilized proteins. Hence, optimal pH was selected to be pH 7.0 (close to physiological pH) (Fig. S7B) (In the presence of 1.0 mM H<sub>2</sub>O<sub>2</sub>).

#### **3.4.3. H<sub>2</sub>O<sub>2</sub> concentration effect**

In this study, different H<sub>2</sub>O<sub>2</sub> concentrations were tried for obtaining optimal immunosensor signals (Fig. S7C). When H<sub>2</sub>O<sub>2</sub> concentration gradually increased to 1.0 mM, the peak current gradually increased. After 1.0 mM H<sub>2</sub>O<sub>2</sub>, peak current decreased inversely. Due to overdose of H<sub>2</sub>O<sub>2</sub> catalyst causing the inhibition of catalytic reaction, the activity of the proteins was negatively affected. Thus, the optimal signals were obtained in 1.0 mM H<sub>2</sub>O<sub>2</sub> in 0.1 M PBS (pH 7.0).

#### **3.4.4. Immune reaction time effect**

When incubation time increased from 10 min to 30 min, peak current responses increase rapidly. After 30 min, immunosensor signals (μA) slightly diminished. Thus, optimal immune reaction time was selected to be 30 min (Fig. S7D) (In the presence of 1.0 mM H<sub>2</sub>O<sub>2</sub> in 0.1 M PBS, pH 7.0).

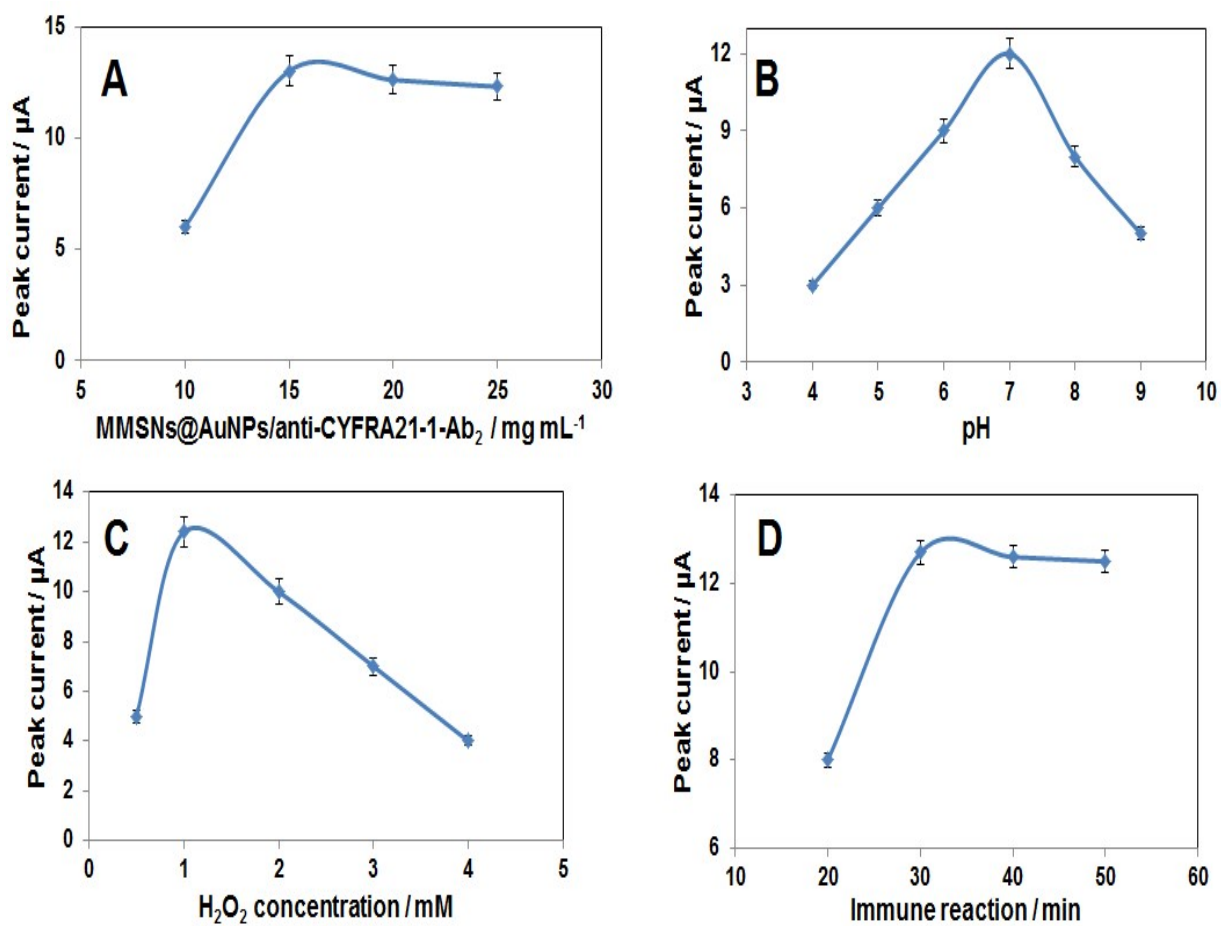

**Fig. S7.** Effect of (A) MMSNs@AuNPs/anti-CYFRA21-1-Ab<sub>2</sub> concentration, (B) pH, (C) H<sub>2</sub>O<sub>2</sub> concentration, (D) immune reaction time (Antigen CYFRA21-1 concentration: 0.1 pg mL<sup>-1</sup>, frequency of 50 Hz, pulse amplitude of 20 mV, scan increment of 3 mV for DPV measurements) (n = 6)

### 3.6. Recovery

**Table S1.** Recovery of CYFRA21-1 in 1.0 mM H<sub>2</sub>O<sub>2</sub> in pH 7.0, 0.1 M PBS (n=6)

| Plasma sample           | Added CYFRA21-1<br>(pg mL <sup>-1</sup> ) | Found CYFRA21-1<br>(pg mL <sup>-1</sup> ) | Recovery<br>(%) |
|-------------------------|-------------------------------------------|-------------------------------------------|-----------------|
| <sup>a</sup> Sample (1) | 0.100                                     | 0.104 ± 0.001                             | -               |
| <sup>b</sup> Sample (2) | Sample(1) + 0.200                         | 0.302 ± 0.002                             | 99.34 ± 0.01    |
| <sup>c</sup> Sample (3) | Sample(1) + 0.400                         | 0.501 ± 0.004                             | 99.40 ± 0.02    |
| <sup>d</sup> Sample (4) | Sample(1) + 0.600                         | 0.700 ± 0.003                             | 99.43 ± 0.02    |

<sup>a</sup>containing 0.100 pg mL<sup>-1</sup> CYFRA21-1, 10.00 pg mL<sup>-1</sup> CEA, 10.00 pg mL<sup>-1</sup> AA, 10.00 pg mL<sup>-1</sup> DA, 10.00 pg mL<sup>-1</sup> UA and 10.00 pg mL<sup>-1</sup> BSA

<sup>b</sup>containing 0.100 + 0.200 pg mL<sup>-1</sup> CYFRA21-1, 10.00 pg mL<sup>-1</sup> CEA, 10.00 pg mL<sup>-1</sup> AA, 10.00 pg mL<sup>-1</sup> DA, 10.00 pg mL<sup>-1</sup> UA and 10.00 pg mL<sup>-1</sup> BSA

<sup>c</sup>containing 0.100 + 0.400 pg mL<sup>-1</sup> CYFRA21-1, 10.00 pg mL<sup>-1</sup> CEA, 10.00 pg mL<sup>-1</sup> AA, 10.00 pg mL<sup>-1</sup> DA, 10.00 pg mL<sup>-1</sup> UA and 10.00 pg mL<sup>-1</sup> BSA

<sup>d</sup>containing 0.100 + 0.600 pg mL<sup>-1</sup> CYFRA21-1, 10.00 pg mL<sup>-1</sup> CEA, 10.00 pg mL<sup>-1</sup> AA, 10.00 pg mL<sup>-1</sup> DA, 10.00 pg mL<sup>-1</sup> UA and 10.00 pg mL<sup>-1</sup> BSA

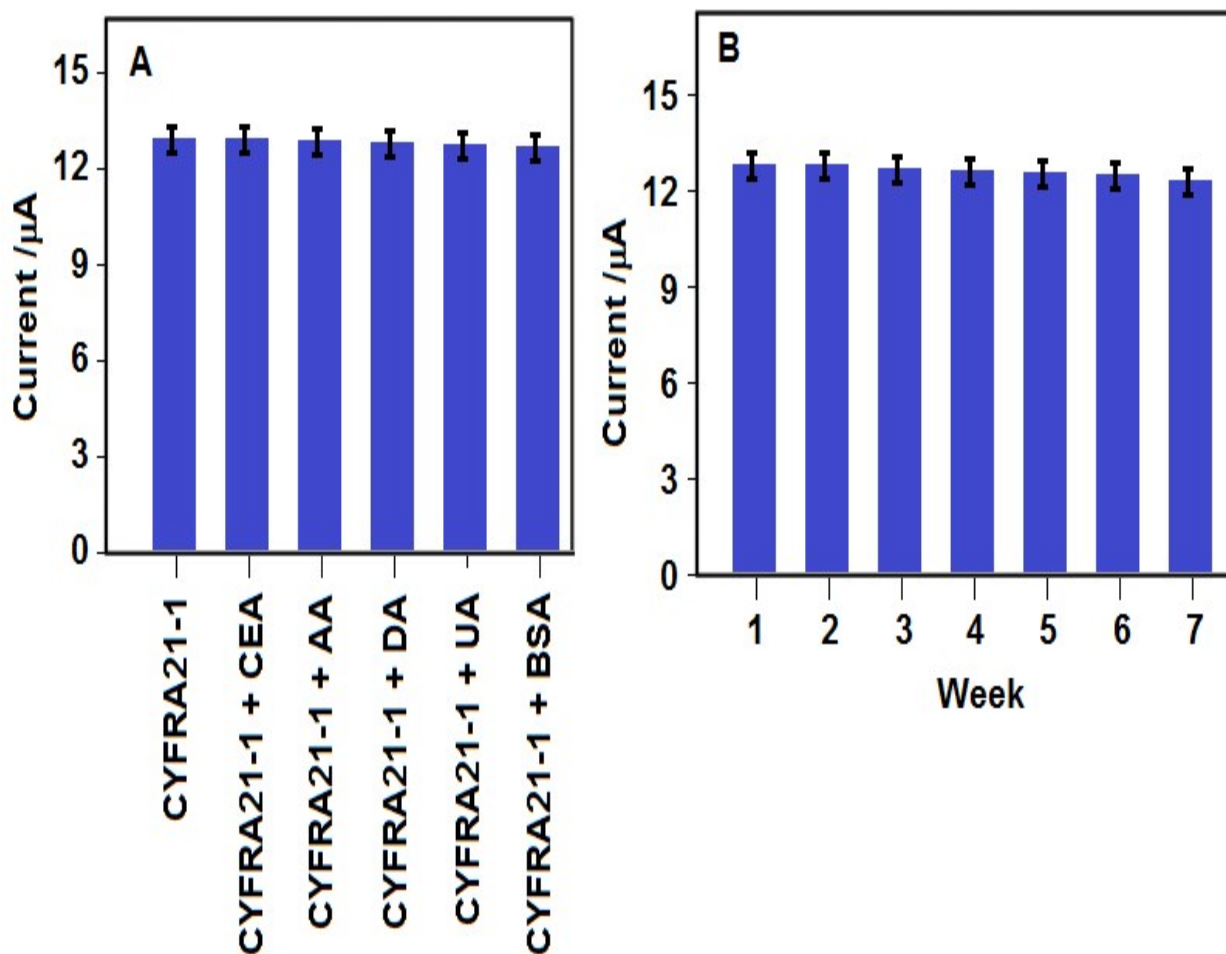

**Fig. S8.** (A) Immunosenor responses against the prepared solutions ( $n = 6$ ): (i)  $0.100 \text{ pg mL}^{-1}$  CYFRA21-1, (ii)  $0.100 \text{ pg mL}^{-1}$  CYFRA21-1 +  $10.00 \text{ pg mL}^{-1}$  CEA, (iii)  $0.100 \text{ pg mL}^{-1}$  CYFRA21-1 +  $10.00 \text{ pg mL}^{-1}$  AA, (iv)  $0.100 \text{ pg mL}^{-1}$  CYFRA21-1 +  $10.00 \text{ pg mL}^{-1}$  DA, (v)  $0.100 \text{ pg mL}^{-1}$  CYFRA21-1 +  $10.00 \text{ pg mL}^{-1}$  UA, (vi)  $0.100 \text{ pg mL}^{-1}$  CYFRA21-1 +  $10.00 \text{ pg mL}^{-1}$  BSA; (B) Stability test of voltammetric CYFRA21-1 immunosensors including  $0.100 \text{ pg mL}^{-1}$  antigen CYFRA21-1 ( $n = 6$ )

### 3.8. Precision and Accuracy

**Table S2.** Intra-day and inter-day precision and accuracy results of CYFRA21-1 in 1.0 mM H<sub>2</sub>O<sub>2</sub> in pH 7.0, 0.1 M PBS (n=6)

| Added<br>pg mL <sup>-1</sup> | Intra-day                                    |                               |                              | Inter-day                                    |                               |                              |
|------------------------------|----------------------------------------------|-------------------------------|------------------------------|----------------------------------------------|-------------------------------|------------------------------|
|                              | Found <sup>a</sup><br>(pg mL <sup>-1</sup> ) | Precision <sup>b</sup><br>(%) | Accuracy <sup>c</sup><br>(%) | Found <sup>a</sup><br>(pg mL <sup>-1</sup> ) | Precision <sup>b</sup><br>(%) | Accuracy <sup>c</sup><br>(%) |
| 0.100                        | 0.101 ±<br>0.0001                            | 0.243                         | 1.00                         | 0.101 ±<br>0.0002                            | 0.485                         | 1.00                         |
| 0.200                        | 0.201 ±<br>0.0003                            | 0.366                         | 0.50                         | 0.199 ±<br>0.0002                            | 0.246                         | 0.50                         |
| 0.500                        | 0.499 ±<br>0.0001                            | 0.049                         | 0.20                         | 0.501 ±<br>0.0002                            | 0.098                         | 0.20                         |

<sup>a</sup>Mean ± Standart Error, <sup>b</sup>Precision %: Relative Standart Deviation (RSD), <sup>c</sup>Bias %: [(found – added)/added]×100%
